# Supplementary material
Source: PubMed Central journal article supplement (PMC4807468)
Supplement: IAI.01325-15_zii999091645so1.pdf [file IAI.01325-15_zii999091645so1.pdf]

**Supplemental Figure 1: Gateway cloning gene silencing and tetracycline-regulated EhSNAP expression plasmids.** The Gateway cloning plasmid for G3 strain *E. histolytica* gene silencing was derived from the previously reported psAP-2 plasmid (1). The EhSNAP expression plasmid was constructed from the tetracycline-regulated plasmid EhSNAPspFLAG (2), which includes the SNAP gene with codon usage optimized for expression in *E. histolytica*.

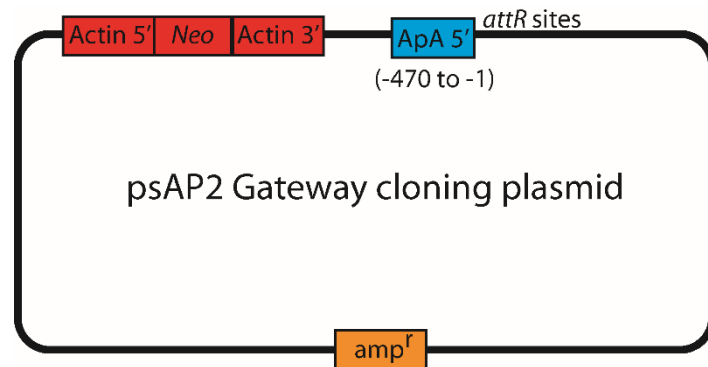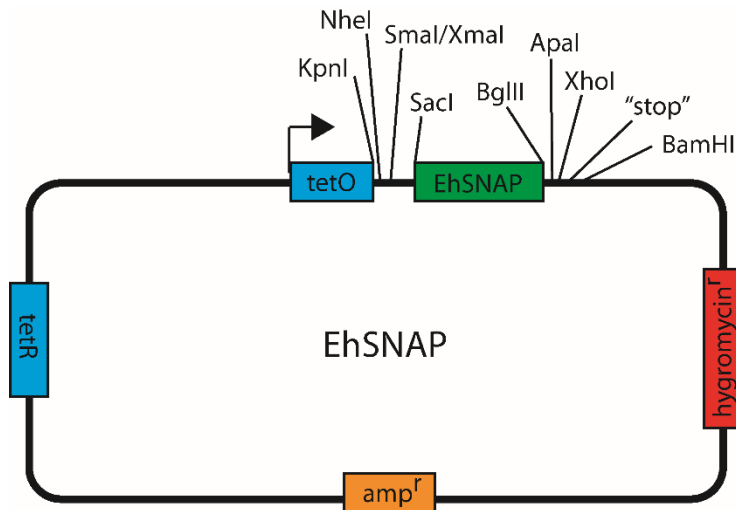

**Supplementary Figure 2: Processing of cell monolayer adherence images.**  
Images from adherence assay, pre (left) and post (right) NIH Image J batch processing.

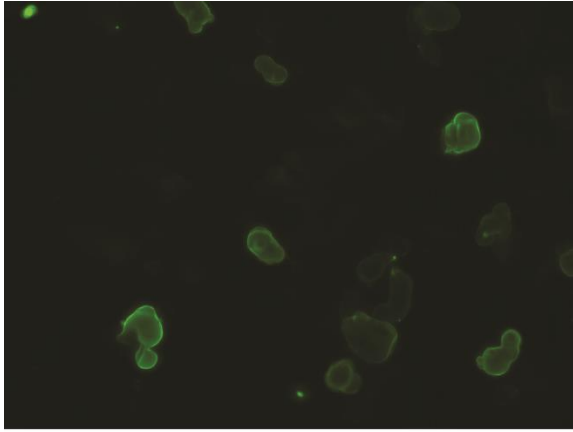

Monolayer adherence image pre-ImageJ

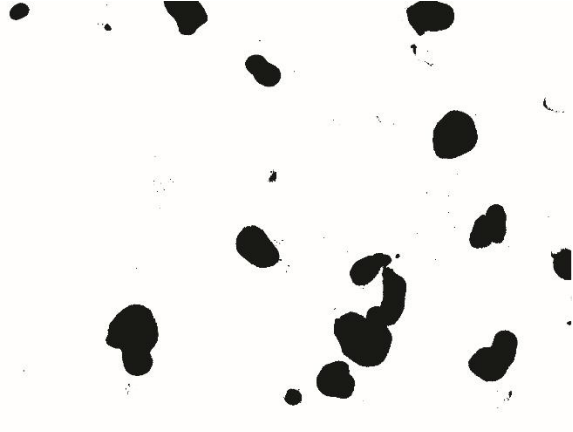

Monolayer adherence image post-ImageJ

**Supplementary Figure 3: Gating scheme for flow cytometry phagocytosis assay.** Data from a representative experiment are shown. (A) Forward and side scatter plot for amebic trophozoites with gating window set on them. (B) Forward and side scatter plot for fluorescently-labeled Jurkat lymphocytes, showing exclusion by the ameba specific gate. (C and D) Forward and side scatter plots for mixed *E. histolytica* and apoptotic (C) or previously healthy (D) Jurkat lymphocytes. (E) Representative fluorescence histograms for gated *E. histolytica* trophozoites after incubation with healthy cells (green) or cells previously killed by apoptosis (white). The M1 gate shows trophozoites with fluorescence above background, which are scored as phagocytic.

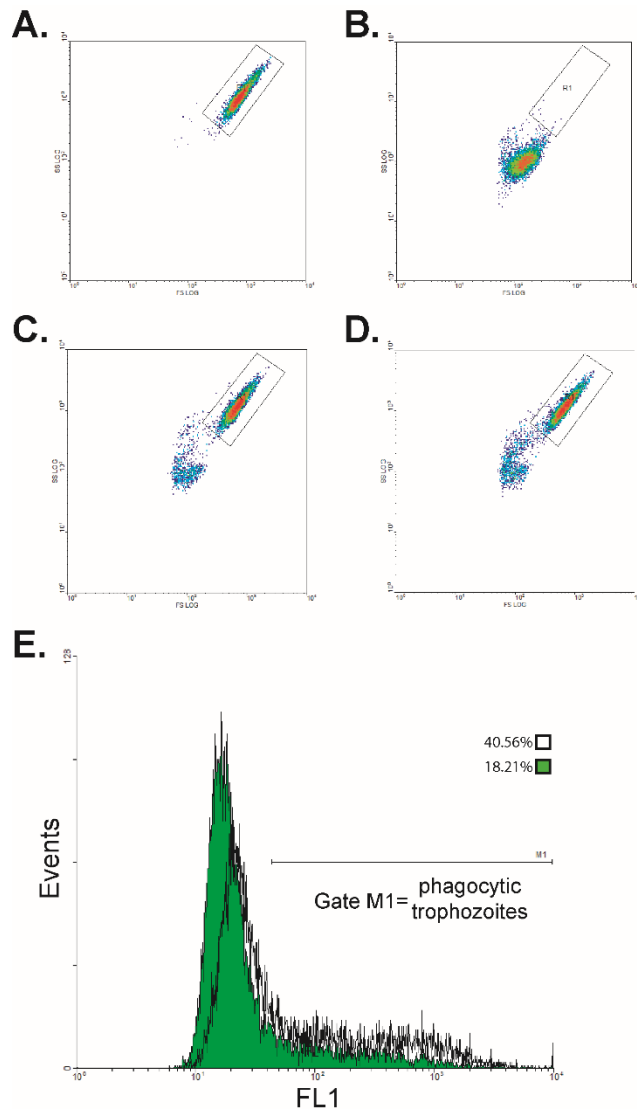

**Supplementary Figure 4: Effects of gene silencing on *E. histolytica* killing of host cells.** Jurkat T lymphocytes loaded with the fluorescent dye BCECF were incubated with G3 strain *E. histolytica* trophozoites silenced for expression of the indicated gene or cells transfected with the empty vector control plasmid(30 min, 37°C). Specific cytotoxicity was calculated as % cytotoxicity =  $(\text{fluorescence}_{\text{experimental}} - \text{fluorescence}_{\text{spontaneous}}) / (\text{fluorescence}_{\text{detergent lysed}} - \text{fluorescence}_{\text{spontaneous}}) \times 100$ . The graph shows the mean and SEM for six biological replicates.

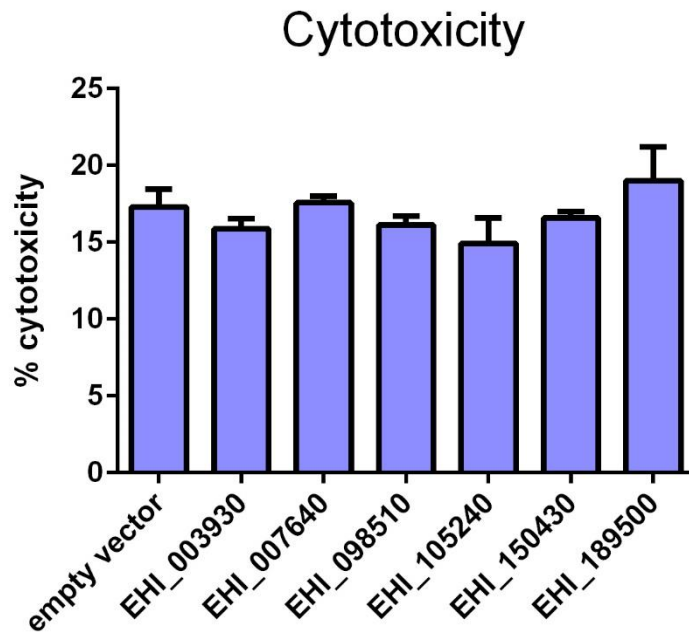

**Supplementary Table 1:** Genes targeted for silencing and preliminary outcome.

| <b>Gene</b>       | <b>Outcome of silencing</b> | <b>Preliminary phagocytosis result</b> | <b>Preliminary adherence result</b> |
|-------------------|-----------------------------|----------------------------------------|-------------------------------------|
| <b>EHI_003930</b> | Silenced                    | Reduced                                | Increased                           |
| <b>EHI_007320</b> | Not viable (2 attempts)     | N/A                                    | N/A                                 |
| <b>EHI_007480</b> | Silenced                    | No effect                              | No effect                           |
| <b>EHI_007640</b> | Silenced                    | Reduced                                | No effect                           |
| <b>EHI_009570</b> | Not viable (2 attempts)     | N/A                                    | N/A                                 |
| <b>EHI_021260</b> | Silenced                    | No effect                              | No effect                           |
| <b>EHI_021270</b> | Not silenced                | N/A                                    | N/A                                 |
| <b>EHI_029600</b> | Silenced                    | No effect                              | No effect                           |
| <b>EHI_045540</b> | Silenced                    | No effect                              | No effect                           |
| <b>EHI_098510</b> | Silenced                    | Reduced                                | No effect                           |
| <b>EHI_105240</b> | Silenced                    | Reduced                                | No effect                           |
| <b>EHI_122800</b> | Silenced                    | No effect                              | No effect                           |
| <b>EHI_148910</b> | Silenced                    | No effect                              | No effect                           |
| <b>EHI_150430</b> | Silenced                    | Reduced                                | No effect                           |
| <b>EHI_167130</b> | Not viable (2 attempts)     | N/A                                    | N/A                                 |
| <b>EHI_167940</b> | Silenced                    | No effect                              | No effect                           |
| <b>EHI_189500</b> | Silenced                    | Possibly reduced                       | Increased                           |
| <b>EHI_197040</b> | Silenced                    | No effect                              | No effect                           |
| <b>EHI_197120</b> | Silenced                    | No effect                              | No effect                           |

**Supplementary Table 2:** Raw (non-normalized) and normalized flow cytometry phagocytosis assay data from Figure 1. Phagocytic trophozoites were determined to be trophozoites with fluorescence above unlabeled control, and gated mean represents the mean fluorescence of phagocytic trophozoites. Phagocytic index is calculated as phagocytic trophozoites (or % gated) multiplied by the gated mean. Gated mean and phagocytic index has been normalized to the average of the empty vector strain.

| <b>Phagocytosis of Apoptotic Cells<br/>(10 minute incubation)</b> |                                  |                     |                           |
|-------------------------------------------------------------------|----------------------------------|---------------------|---------------------------|
| <b>Strain</b>                                                     | <b>% Phagocytic Trophozoites</b> | <b>% Gated Mean</b> | <b>% Phagocytic Index</b> |
| empty vector                                                      | 45.33±5.4                        | 100±3.7             | 100±6.2                   |
| EHI_003930                                                        | 37.87±5.9                        | 70.68±4.6           | 58.99±7.5                 |
| EHI_007640                                                        | 36.49±5.6                        | 80.23±5.0           | 64.63±9.2                 |
| EHI_098510                                                        | 41.94±4.3                        | 81.07±2.4           | 75.09±4.0                 |
| EHI_105240                                                        | 35.16±11                         | 74.34±6.4           | 57.65±16.9                |
| EHI_150430                                                        | 34.84±6.6                        | 86.35±6.4           | 49.25±26.4                |
| EHI_189500                                                        | 44.30±4.7                        | 105.15±3.5          | 103.03±8.6                |

  

| <b>Phagocytosis of Live Cells<br/>(25 minute incubation)</b> |                                  |                     |                           |
|--------------------------------------------------------------|----------------------------------|---------------------|---------------------------|
| <b>Strain</b>                                                | <b>% Phagocytic Trophozoites</b> | <b>% Gated Mean</b> | <b>% Phagocytic Index</b> |
| empty vector                                                 | 70.30±6.2                        | 100±4.8             | 100±3.7                   |
| EHI_003930                                                   | 59.65±8.0                        | 82.03±16.6          | 70.05±17.3                |
| EHI_007640                                                   | 68.06±6.7                        | 80.98±14.7          | 77.55±7.1                 |
| EHI_098510                                                   | 70.25±8.5                        | 87.47±21.1          | 85.32±6.8                 |
| EHI_105240                                                   | 65.66±9                          | 78.40±19.1          | 73.72±21.4                |
| EHI_150430                                                   | 67.34±6.1                        | 81.94±23.5          | 78.76±23.5                |
| EHI_189500                                                   | 74.75±8.4                        | 98.37±20.75         | 103.29±13.5               |

**Supplementary Table 3:** Predicted conserved protein domains and corresponding E-values.

| <b>Protein</b>    | <b>Predicted domain (E-value)</b>                                                                                                                                 |
|-------------------|-------------------------------------------------------------------------------------------------------------------------------------------------------------------|
| <b>EHI_003930</b> | ANTH (E=2.2x10 <sup>-26</sup> ); I/LWEQ (E=2.4x10 <sup>-47</sup> )                                                                                                |
| <b>EHI_007640</b> | Calponin homology (CH)(E=8.7x10 <sup>-19</sup> ); LIM (E=2.5x10 <sup>-15</sup> ); C2 (E=8.3x10 <sup>-7</sup> ); Pleckstrin homology (PH)(E=5.2x10 <sup>-7</sup> ) |
| <b>EHI_098510</b> | Signal Peptide (SP-HMM algorithm; probability=0.999); Transmembrane Domain (TMHMM algorithm; cumulative probability=1.21)                                         |
| <b>EHI_105240</b> | BAR (E=1.3x10 <sup>-4</sup> ); SH3 (E=1.1x10 <sup>-20</sup> )                                                                                                     |
| <b>EHI_150430</b> | 3 LRR domains (E≤1.7x10 <sup>-3</sup> ); Gelsolin homology (GH); (E≤8.2x10 <sup>-6</sup> ); Villidin headpiece (E=2.2x10 <sup>-8</sup> )                          |
| <b>EHI_189500</b> | Calponin homology (CH)(E=6.2x10 <sup>-6</sup> )                                                                                                                   |

## Supplemental Information 1: PCR primers.

### Primers for Gateway cloning of gene silencing constructs:

#### EHI\_003930:

(forward) 5'-ATGGAGAAAACCTATTAATAAAGCAACTGA-3'

(reverse) 5'-TTAATTGTTTTGTCTTTCATAACGTTGT-3'

#### EHI\_007320:

(forward) 5'-ATGAGCCAATTCTCTAAAAAACCA-3'

(reverse) 5'-TTACTTTTTGCCTTACTTTTTCTTCTCT-3'

#### EHI\_007480:

(forward) 5'-ATGAGTGATTAACTGATTTGATGAAAA-3'

(reverse) 5'-TTAGAATAATTTAGCTTTTCTTCGTTTCAG-3'

#### EHI\_007640:

(forward) 5'-ATGCAAGGGACACAAGCTTTAC-3'

(reverse) 5'-TTAGATAAGCACTATATTGTCAATAGCTTCTT-3'

#### EHI\_009570:

(forward) 5'-ATGTCAGAAGAGGAAGGAAAAAAA-3'

(reverse) 5'-TTATTTATCGTGTTCTAAATCAGGCC-3'

#### EHI\_021260:

(forward) 5'-ATGTCAGACGAAGAGATTAGGAAAC-3'

(reverse) 5'-TTAGAACAATTTATGTTGTTTTTTCAATT-3'

#### EHI\_021270:

(forward) 5'-ATGGGGGAACAACAATCTATACC-3'

(reverse) 5'-TTAATAAAGCTTCTTTGCTTTTTTTTAGG-3'

#### EHI\_029600:

(forward) 5'-ATGAGTGATTGTGTTGGTATTGATAAC-3'

(reverse) 5'-TTATCCTCTACCTCTTCTACTGAATGAAT-3'

#### EHI\_045540:

(forward) 5'-ATGAGTCAAATGATTGTAAAGGCTAA-3'

(reverse) 5'-TCATTTTGTTTCTATGGATTTGATAAG-3'

#### EHI\_098510:

(forward) 5'-ATGTTAATCATTTTCTTATTTACATTATTTACTCT-3'

(reverse) 5'-TTACTCGCTTGCAGAACCTG-3'

#### EHI\_105240:

(forward) 5'-ATGTCTATCAGAGATGCATTGAGC-3'

(reverse) 5'-TTAAAGTGGTTGTAAAAAGTTGGATG-3'

#### EHI\_122800:

(forward) 5'-ATGAGTGTTTCAAGAAGAACATTGTC-3'

(reverse) 5'-TTAATAGAGATAAACTGAGTGTTTAACTTATCTC-3'

#### EHI\_148910:

(forward) 5'-ATGGAGGAAATTACTAAGGAAAGTATTATTC-3'

(reverse) 5'-TTAGTGAAACGAATGGTGGTAAGTT-3'

#### EHI\_150430:

(forward) 5'-ATGGGACAAGAGAACTCAAACA-3'

(reverse) 5'-TTAATAAAGTTTTAGTGCATGTTTTTGC-3'

#### EHI\_167130:



(forward) 5'-ATGACACAAGTAATTCTTCGTATACATTTT-3'  
(reverse) 5'-TTATTCCTTTTGTCTTCTCTTAGCCA-3'

EHI 167940:

(forward) 5'-ATGGAAGTTATTGGATATGCACC-3'  
(reverse) 5'-TACTTAGTTGAAAGAAGTGATAATTTTCTTC-3'

EHI 189500:

(forward) 5'-ATGGTTAAATGGCTTGAATTTGTT-3'  
(reverse) 5'-TTAATTCATTGAGATATTATCATTCTGC-3'

EHI 197040:

(forward) 5'-ATGAGCGTTAAGGAAAACCAAG-3'  
(reverse) 5'-TTAATGTATACTTTCTCGTGAATCACTTC-3'

EHI 197120:

(forward) 5'-ATGTCTGAGGGAACAAAACCTCAG-3'  
(reverse) 5'-TTAAAGGATCTTAACGACAATGACAG-3'

**Primers for qRT-PCR:**

EHI 003930:

(forward) 5'-ATGGAGAAAACCTATTAATAAAGCAACTGA-3'  
(reverse) 5'-AATCTATCTAATTCTGGAATCCATCCT-3'

EHI 007320:

(forward) 5'-ATACAAATACCACATCAAATTGACTCC-3'  
(reverse) 5'-TACTTTTTGCCTTTACTTTTTCTTCTCT-3'

EHI 007480:

(forward) 5'-TTCGTTTTAGATTACAGTTCAAAGGAT-3'  
(reverse) 5'-TTAGAATAATTTAGCTTTTCTTCGTTTCAG-3'

EHI 007640:

(forward) 5'-TTCGTTTTAGATTACAGTTCAAAGGAT-3'  
(reverse) 5'-TTAGATAAGCACTATATTGTCAATAGCTTCTT-3'

EHI 009570:

(forward) 5'-GCAGTGGACAAGAAGAACACC-3'  
(reverse) 5'-TTATTTATCGTGTTCTAAATCAGGCC-3'

EHI 021260:

(forward) 5'-ATGTCAGACGAAGAGATTAGGAAAC-3'  
(reverse) 5'-GGAGTTGTTCTGCTTCTAACCTAACT-3'

EHI 021270:

(forward) 5'-ATGGGGGAACAACAATCTATACC-3'  
(reverse) 5'-ACACGAAGTTGATTACTTTCTACCTGT-3'

EHI 029600:

(forward) 5'-GTAGACGTTTCATCAAGTATTTCAAGTG-3'  
(reverse) 5'-TTATCCTCTACCTCTTCTACTGAATGAAT-3'

EHI 045540:

(forward) 5'-ATGAGTCAAATGATTGTTAAGGCTAA-3'  
(reverse) 5'-TAAAACCTTCTCCTGCTTTAGTTTTTCAT-3'

EHI 098510:

(forward) 5'-CTCTTAGTTGCTTTCATTCTTTATGCT-3'  
(reverse) 5'-TACTCGCTTGCAGAACCTG-3'

EHI 105240:

(forward) 5'-GAATGTGATGAAGATACTGAAGAA-3'  
(reverse) 5'-TTAAAGTGGTTGTAAAAAGTTGGATG-3'

EHI 122800:

(forward) 5'-ATGAGTGTTC AAGAAGAACATTGTC-3'  
(reverse) 5'-TGGTTTATCACTTATTCTTTCTGCTTT-3'

EHI 148910:

(forward) 5'-ATTTGGGGATACATTAACAACAAAA-3'  
(reverse) 5'-TTAGTGAAACGAATGGTGGTAAGTT-3'

EHI 150430:

(forward) 5'-ATGGGACAAGAGAACTCAAACA-3'  
(reverse) 5'-TTCAGCTAAAACACATAATAATGATGAA-3'

EHI 167130:

(forward) 5'-ATGACACAAGTAATTCTTCGTATACATTTT-3'  
(reverse) 5'-ATGGTCTAATATCAAGTGTCTCGGTAG-3'

EHI 167940:

(forward) 5'-CAACAGGTGATAGTATTTCACAAAGT-3'  
(reverse) 5'-TACTTAGTTGAAAGAAGTGATAATTTTCTTC-3'

EHI 189500:

(forward) 5'-ATGGTTAAATGGCTTGAATTTGTT-3'  
(reverse) 5'-TTTTTGAGCAATAATAGTAAAGAATGC-3'

EHI 197040:

(forward) 5'-ATAATTGTGTTAGCTTAAATTGGCTTG-3'  
(reverse) 5'-TTAATGTATACTTTCTCGTGAATCACTTC-3'

EHI 197120:

(forward) 5'-ATGTCTGAGGGAACAAAACCTCAG-3'  
(reverse) 5'-ATTTATATTCCTTCTCACTCCCTTCTT-3'

**Primers for cloning EhSNAP expression vectors:**

EHI\_003930 (EhILWEQ):

BglII-EHI\_003930 (forward) 5'-AGATCTATGGAGAAAAC TATT  
AATAAGCAACTGA-3'

XhoI-EHI\_003930 (reverse) 5'-CTCGAGTTAATTGTTTTGTCT  
TTCATAACGTTG-3'

EHI\_105240 (EhBAR):

BglII-EHI\_105240 (forward) 5'-AGATCTATGTCTATCAGAGAT  
GCAT TGAGC-3'

XhoI-EHI\_105240 (reverse) 5'-CTCGAGTTAAAGTGGTTGTAA  
AAAGTTGGATG-3'

**Supplemental reference list:**

1. **Bracha R, Nuchamowitz Y, Mirelman D.** 2003. Transcriptional silencing of an amoebapore gene in *Entamoeba histolytica*: molecular analysis and effect on pathogenicity. *Eukaryot Cell* **2**:295-305.
2. **Sateriale A, Roy NH, Huston CD.** 2013. SNAP-tag technology optimized for use in *Entamoeba histolytica*. *PLoS One* **8**:e83997.
